# Supplementary material for: A Comparison of Lipid Contents in Different Types of Peanut Cultivars Using UPLC-Q-TOF-MS-Based Lipidomic Study
Source: MDPI journal article supplement (doi:10.3390/foods11010004), 2021-12-21
Supplement: s1 [file s1]

Table S1: Fatty acid contents in different peanut cultivars (mg · g<sup>-1</sup> W).

| Number | Name                               | CAS # | MolForm | Jihua16-1 | Jihua16-2 | Jihua16-3 | Jihua13-1 | Jihua13-2 | Jihua13-3 | Kainong17 | Yuhua37-1 | Yuhua37-2 | Yuhua37-3 | Kainong71 | Kainong71 | Kainong71 | Zhanjiang2 | Zhanjiang2 | Zhanjiang2 | Zhonghua2 | Zhonghua2 | Zhonghua2 | Heyou11-1 | Heyou11-2 | Heyou11-3 | Heyou12-1 | Heyou12-2 | Heyou12-3 | Fuhua14-1 | Fuhua14-2 | Fuhua14-3 | Yueyou45 | Yueyou45 | Yueyou45 | Yueyou45 | Guihua836 | Guihua836 | Guihua836-3 |  |  |  |
|--------|------------------------------------|-------|---------|-----------|-----------|-----------|-----------|-----------|-----------|-----------|-----------|-----------|-----------|-----------|-----------|-----------|-----------|-----------|-----------|-----------|-----------|-----------|------------|------------|------------|-----------|-----------|-----------|-----------|-----------|-----------|-----------|-----------|-----------|-----------|-----------|-----------|----------|----------|----------|----------|-----------|-----------|-------------|--|--|--|
| 1      | Headecear 1120 - 25 - (C17H35O2)   |       |         | 0.43      | 0.45      | 0.46      | 0.52      | 0.49      | 0.51      | 0.36      | 0.36      | 0.35      | 0.39      | 0.37      | 0.36      | 0.34      | 0.33      | 0.29      | 0.32      | 0.28      | 0.18      | 0.22      | 0.18       | 0.10       | 0.09       | 0.09      | 0.09      | 0.10      | 0.10      | 0.16      | 0.15      | 0.24      | 0.22      | 0.19      | 0.19      | 0.08      | 0.09      | 0.08     | 0.04     | 0.04     | 0.03     | 0.07      | 0.01      | 0.09        |  |  |  |
| 2      | Hexadecar 112 - 39 - (C17H34O2)    |       |         | 23.04     | 22.56     | 23.28     | 22.18     | 21.37     | 21.96     | 19.96     | 20.22     | 20.97     | 18.66     | 19.83     | 18.85     | 17.48     | 17.95     | 17.64     | 15.99     | 16.76     | 16.14     | 23.44     | 25.10      | 24.00      | 10.61      | 10.14     | 10.14     | 14.12     | 14.60     | 14.73     | 19.64     | 18.57     | 18.68     | 27.18     | 25.90     | 25.74     | 12.52     | 12.57    | 12.74    | 28.70    | 28.26    | 29.54     |           |             |  |  |  |
| 3      | Cyclopropi 10152 - 61 (C18H34O2)   |       |         | 0.16      | 0.15      | 0.15      | 0.16      | 0.16      | 0.14      | 0.10      | 0.10      | 0.11      | 0.13      | 0.12      | 0.10      | 0.10      | 0.10      | 0.10      | 0.10      | 0.10      | 0.10      | 0.08      | 0.06       | 0.06       | 0.06       | 0.05      | 0.04      | 0.03      | 0.03      | 0.07      | 0.06      | 0.05      | 0.08      | 0.06      | 0.08      | 0.04      | 0.04      | 0.03     | 0.07     | 0.01     | 0.09     |           |           |             |  |  |  |
| 4      | Heptadeca 1731 - 92 - (C18H36O2)   |       |         | 0.25      | 0.23      | 0.24      | 0.19      | 0.21      | 0.21      | 0.18      | 0.16      | 0.20      | 0.21      | 0.20      | 0.20      | 0.16      | 0.15      | 0.16      | 0.15      | 0.14      | 0.17      | 0.17      | 0.21       | 0.18       | 0.13       | 0.11      | 0.11      | 0.11      | 0.12      | 0.12      | 0.18      | 0.17      | 0.15      | 0.22      | 0.19      | 0.20      | 0.12      | 0.11     | 0.11     | 0.18     | 0.31     | 0.23      |           |             |  |  |  |
| 5      | 9,12-Octadec 112 - 63 - (C19H34O2) |       |         | 2.53      | 3.03      | 2.14      | 2.06      | 2.09      | 2.92      | 2.34      | 2.71      | 2.55      | 1.86      | 2.17      | 2.18      | 3.39      | 3.01      | 3.47      | 2.32      | 2.98      | 2.17      | 72.68     | 78.26      | 71.43      | 29.38      | 26.63     | 25.39     | 40.41     | 42.65     | 44.59     | 54.09     | 51.18     | 50.59     | 74.59     | 71.67     | 71.36     | 36.58     | 36.22    | 37.27    | 78.64    | 77.30    | 78.83     |           |             |  |  |  |
| 6      | 9-Octadecol 1937 - 62 - (C19H36O2) |       |         | 145.25    | 146.73    | 148.65    | 137.36    | 138.07    | 136.29    | 134.78    | 133.96    | 138.57    | 121.80    | 125.01    | 121.28    | 113.69    | 112.58    | 113.21    | 101.89    | 104.44    | 106.35    | 43.00     | 45.10      | 43.29      | 19.97      | 19.04     | 18.57     | 27.04     | 27.27     | 27.68     | 41.22     | 40.95     | 41.92     | 40.99     | 40.16     | 42.01     | 20.18     | 19.78    | 19.92    | 43.04    | 43.84    | 45.29     |           |             |  |  |  |
| 7      | Methyl ste 112 - 61 - (C19H38O2)   |       |         | 22.27     | 22.39     | 23.02     | 15.87     | 14.98     | 15.71     | 16.28     | 16.67     | 17.50     | 15.39     | 16.11     | 14.33     | 13.22     | 13.75     | 13.23     | 11.37     | 11.98     | 12.32     | 10.90     | 12.40      | 10.57      | 3.95       | 3.79      | 3.54      | 6.97      | 7.28      | 7.48      | 9.30      | 8.59      | 8.93      | 10.47     | 9.97      | 9.89      | 6.04      | 6.00     | 6.06     | 7.10     | 8.45     | 8.06      |           |             |  |  |  |
| 8      | 10-Nonadec 56599 - 83 (C20H40O2)   |       |         | 0.07      | 0.08      | 0.07      | 0.05      | 0.05      | 0.04      | 0.05      | 0.04      | 0.03      | 0.05      | 0.06      | 0.04      | 0.05      | 0.04      | 0.05      | 0.05      | 0.05      | 0.05      | 0.03      | 0.03       | 0.03       | 0.03       | 0.02      | 0.03      | 0.02      | 0.01      | 0.02      | 0.02      | 0.04      | 0.03      | 0.03      | 0.03      | 0.03      | 0.02      | 0.01     | 0.02     | 0.03     | 0.04     | 0.04      |           |             |  |  |  |
| 9      | cis-Methyl 2390 - 9 - (C21H40O2)   |       |         | 4.83      | 4.83      | 4.91      | 4.82      | 4.72      | 4.72      | 4.20      | 4.26      | 4.36      | 3.94      | 4.20      | 4.02      | 3.75      | 3.78      | 3.82      | 3.50      | 3.67      | 3.48      | 2.00      | 2.29       | 1.89       | 0.84       | 0.80      | 0.72      | 1.03      | 1.12      | 1.10      | 1.84      | 1.64      | 1.71      | 2.05      | 1.94      | 1.94      | 1.01      | 0.98     | 0.99     | 2.32     | 3.41     | 2.65      |           |             |  |  |  |
| 10     | Eicosanol 1120 - 28 - (C21H42O2)   |       |         | 8.79      | 8.83      | 8.96      | 6.36      | 6.18      | 6.34      | 6.69      | 6.74      | 6.97      | 6.29      | 6.64      | 5.99      | 5.44      | 5.47      | 5.53      | 4.83      | 4.86      | 4.83      | 4.57      | 5.29       | 4.48       | 1.81       | 1.72      | 1.60      | 2.53      | 2.65      | 2.64      | 3.79      | 3.43      | 3.58      | 4.07      | 3.70      | 3.67      | 2.33      | 2.29     | 2.36     | 3.01     | 4.50     | 3.54      |           |             |  |  |  |
| 11     | Heptacosal 1064 - 90 - (C22H44O2)  |       |         | 0.08      | 0.07      | 0.07      | 0.05      | 0.05      | 0.05      | 0.06      | 0.04      | 0.06      | 0.04      | 0.05      | 0.04      | 0.05      | 0.04      | 0.03      | 0.04      | 0.04      | 0.03      | 0.05      | 0.05       | 0.04       | 0.02       | 0.02      | 0.01      | 0.02      | 0.03      | 0.02      | 0.04      | 0.03      | 0.03      | 0.05      | 0.04      | 0.05      | 0.03      | 0.03     | 0.03     | 0.05     | 0.04     |           |           |             |  |  |  |
| 12     | 13-Docosene 1120 - 34 - (C23H44O2) |       |         | 0.29      | 0.26      | 0.34      | 0.31      | 0.30      | 0.27      | 0.24      | 0.25      | 0.24      | 0.21      | 0.24      | 0.23      | 0.24      | 0.23      | 0.24      | 0.21      | 0.22      | 0.20      | 0.10      | 0.11       | 0.08       | 0.03       | 0.03      | 0.03      | 0.04      | 0.05      | 0.05      | 0.09      | 0.08      | 0.08      | 0.12      | 0.10      | 0.11      | 0.05      | 0.05     | 0.05     | 0.13     | 0.17     | 0.14      |           |             |  |  |  |
| 13     | Docosanol 929 - 77 - (C23H46O2)    |       |         | 11.69     | 11.52     | 11.93     | 9.46      | 9.14      | 9.18      | 9.89      | 9.78      | 10.21     | 8.51      | 9.04      | 8.32      | 8.00      | 8.10      | 8.02      | 7.02      | 7.21      | 7.05      | 7.17      | 8.02       | 7.12       | 3.05       | 2.91      | 2.71      | 3.83      | 3.99      | 3.94      | 5.86      | 5.45      | 5.53      | 6.43      | 6.06      | 5.89      | 4.00      | 3.86     | 3.92     | 6.01     | 7.77     | 6.81      |           |             |  |  |  |
| 14     | Tricosanol 2433 - 97 - (C24H48O2)  |       |         | 0.11      | 0.12      | 0.11      | 0.11      | 0.10      | 0.10      | 0.10      | 0.09      | 0.08      | 0.08      | 0.08      | 0.08      | 0.08      | 0.07      | 0.07      | 0.08      | 0.07      | 0.07      | 0.10      | 0.09       | 0.04       | 0.04       | 0.03      | 0.04      | 0.03      | 0.04      | 0.06      | 0.06      | 0.06      | 0.09      | 0.07      | 0.09      | 0.05      | 0.04      | 0.03     | 0.06     | 0.13     | 0.08     |           |           |             |  |  |  |
| 15     | Tetracosar 5129 - 66 - (C24H48O2)  |       |         | 5.26      | 5.19      | 5.42      | 5.06      | 4.84      | 4.94      | 4.32      | 4.38      | 4.46      | 4.48      | 4.74      | 4.45      | 4.17      | 4.16      | 4.19      | 3.73      | 3.88      | 3.68      | 3.25      | 3.61       | 3.02       | 1.32       | 1.27      | 1.14      | 1.65      | 1.73      | 1.68      | 2.66      | 2.43      | 2.43      | 3.09      | 2.85      | 2.87      | 1.40      | 1.41     | 1.40     | 3.00     | 4.35     | 3.38      |           |             |  |  |  |
| 16     | Hexacosan 5802 - 82 - (C27H54O2)   |       |         | 0.70      | 0.70      | 0.72      | 0.71      | 0.66      | 0.67      | 0.53      | 0.47      | 0.50      | 0.67      | 0.67      | 0.67      | 0.56      | 0.59      | 0.58      | 0.51      | 0.44      | 0.46      | 0.40      | 0.47       | 0.35       | 0.15       | 0.16      | 0.13      | 0.15      | 0.18      | 0.18      | 0.29      | 0.24      | 0.26      | 0.30      | 0.30      | 0.24      | 0.14      | 0.13     | 0.13     | 0.28     | 0.40     | 0.31      |           |             |  |  |  |
|        | SUM                                |       |         | 225.75    | 227.15    | 230.48    | 205.28    | 203.41    | 204.05    | 200.07    | 200.24    | 207.15    | 182.66    | 189.56    | 181.19    | 170.72    | 170.38    | 170.66    | 152.06    | 157.17    | 157.37    | 168.06    | 181.35     | 166.80     | 71.50      | 66.83     | 63.67     | 98.08     | 101.87    | 104.39    | 139.32    | 133.07    | 134.18    | 169.99    | 163.24    | 164.25    | 84.57     | 83.60    | 85.14    | 172.74   | 179.19   | 179.19    |           |             |  |  |  |
|        | Olric acid conte                   |       |         | 64.34     | 64.60     | 64.50     | 66.91     | 67.88     | 66.79     | 67.37     | 66.90     | 66.89     | 66.68     | 65.95     | 66.93     | 66.59     | 66.07     | 66.33     | 67.01     | 66.45     | 67.58     | 25.58     | 24.87      | 25.95      | 27.93      | 28.49     | 29.17     | 27.57     | 26.77     | 26.51     | 28.59     | 30.77     | 31.24     | 24.12     | 24.60     | 25.56     | 23.86     | 23.66    | 23.40    | 24.91    | 24.47    | 25.28     |           |             |  |  |  |
|        | Linoleic acid cor                  |       |         | 1.12      | 1.33      | 0.93      | 1.00      | 1.03      | 1.43      | 1.17      | 1.35      | 1.23      | 1.02      | 1.14      | 1.20      | 1.98      | 1.77      | 2.03      | 1.52      | 1.90      | 1.38      | 43.25     | 43.15      | 42.82      | 41.09      | 39.84     | 39.88     | 41.20     | 41.86     | 42.71     | 38.82     | 38.46     | 37.70     | 43.88     | 43.91     | 43.42     | 43.25     | 43.33    | 43.77    | 45.52    | 43.14    | 43.99     |           |             |  |  |  |
