# Supplementary material for: A Comparison of Lipid Contents in Different Types of Peanut Cultivars Using UPLC-Q-TOF-MS-Based Lipidomic Study
Source: MDPI journal article supplement (doi:10.3390/foods11010004), 2021-12-21
Supplement: s1 [file s1]

Table S2: Lipid composition of different peanut cultivars.

| Ion | LipidIon           | LipidGroup        | Class  | FattyAcid      | FA1       | FA2      | FA3 | ObsMz       | IonFormula        | Area[HyeouArea[HyeouArea[FuhuaArea[ZhanjiArea[YueyoArea[GulhuArea[ZhongArea[KainorArea[YuhuaArea[KainorArea[KainorArea[Jihua1Area[Jihua13] |             |            |                 |            |            |            |            |            |            |            |            |            |            |
|-----|--------------------|-------------------|--------|----------------|-----------|----------|-----|-------------|-------------------|--------------------------------------------------------------------------------------------------------------------------------------------|-------------|------------|-----------------|------------|------------|------------|------------|------------|------------|------------|------------|------------|------------|
| NEG | Cer(d34:2)         | Cer(d34:2+O)-H    | Cer    | (d34:2+O)      | (d34:2+O) |          |     | 550.484083  | C34 H64 O4 N1     | 619792.36                                                                                                                                  | 1818608.5   | 30494.795  | 14375.11        | 243367.55  | 10341.19   | 45641.838  | 76228.382  | 66159.797  | 28368.156  | 106268.66  | 19002.681  | 7256704.2  |            |
| NEG | Cer(t17:1/25+O+0)  | 680:4182+O        | Cer    | (t17:1_25+O+0) | (t17:1)   | (25+O+0) |     | 165.574938  | C42 H82 O5 N1     | 101657.38                                                                                                                                  | 95428.33    | 10958483   | 4042045.4       | 2507316    | 59605118   | 7872129.1  | 4849076.5  | 5850667.6  | 9794797.6  | 16687064   | 18339677   | 112892.95  |            |
| NEG | Cer(t32:0)         | Cer(t32:0)+HCOO   | Cer    | (t32:0)        | (t32:0)   |          |     | 572.489563  | C33 H66 O6 N1     | 0                                                                                                                                          | 4209.2232   | 303042.14  | 1.055           | 1387630.4  | 8279.2371  | 928877.61  | 1977239.8  | 1176737.8  | 0.64       | 1748922.9  | 1994270.5  | 30920.945  |            |
| NEG | Cer(t34:0)         | Cer(t34:0)+HCOO   | Cer    | (t34:0)        | (t34:0)   |          |     | 600.520863  | C35 H70 O6 N1     | 0                                                                                                                                          | 4209.2232   | 303042.14  | 1.055           | 1387630.4  | 8279.2371  | 928877.61  | 1977239.8  | 1176737.8  | 0.64       | 1748922.9  | 1994270.5  | 30920.945  |            |
| NEG | Cer(t42:1+O)       | Cer(t42:1+O)+HCOO | Cer    | (t17:1_25+O+0) | (t17:1)   | (25+O+0) |     | 726.625328  | C43 H84 O7 N1     | 11.432                                                                                                                                     | 230001.72   | 5629741.4  | 4899166.7       | 45950.416  | 24985996   | 46006466   | 2737154.5  | 2801227.3  | 7104161.4  | 8435784.6  | 9264611.2  | 41546.115  |            |
| NEG | CL(74:10)          | CL(74:10)-2H      | CL     | (74:10)        | (74:10)   |          |     | 735.478839  | C83 H140 O17 P2   | 1160562.5                                                                                                                                  | 1282924.7   | 73588.978  | 45917.338       | 1919296.6  | 3292.6137  | 2725.4556  | 2760649.2  | 4080595.3  | 2005017.1  | 5695.9809  | 2744500.8  |            |            |
| NEG | CL(87:9)           | CL(87:9)-2H       | CL     | (87:9)         | (87:9)    |          |     | 827.588389  | C96 H168 O17 P2   | 1601596.4                                                                                                                                  | 2516749.8   | 14577808   | 9903697.6       | 1673379.2  | 10851374   | 21229857   | 12966159   | 8139344.2  | 33131311   | 12778575   | 20481683   | 287660.89  |            |
| NEG | dMePE(16:0/18:1)   | dMePE(34:1)-H     | dMePE  | (16:0_18:1)    | (16:0)    | (18:1)   |     | 144.554881  | C41 H79 O8 N1 P1  | 18559014                                                                                                                                   | 14968312    | 61705.127  | 44836.397       | 21054458   | 11002935   | 37322.974  | 13595640   | 17012885   | 1934510.2  | 13949017   | 1934510.2  | 18527637   |            |
| NEG | dMePE(18:2/18:2)   | dMePE(36:4)-H     | dMePE  | (18:2_18:2)    | (18:2)    | (18:2)   |     | 766.339231  | C43 H77 O8 N1 P1  | 20143.964                                                                                                                                  | 670470.1    | 256454.4   | 8212958.4       | 88069.081  | 11484173   | 3840023.4  | 139072.6   | 91279.895  | 46015.897  | 46489.29   | 10907.329  | 106411.881 |            |
| NEG | HexCer(t34:2)+HCOO | HexCer(t34:2)+H   | HexCer | (t34:2)        | (t34:2)   |          |     | 758.542388  | C41 H76 O11 N1    | 1944.5211                                                                                                                                  | 5356.5792   | 24199326   | 11899355        | 906842.34  | 32539459   | 20644132   | 4485276.2  | 104217.55  | 27606312   | 6234433.7  | 15708409   | 24340.08   |            |
| NEG | HexCer(t33:2)+H    | HexCer(t33:2)+H   | HexCer | (t33:2)        | (t33:2)   |          |     | 844.579168  | C45 H82 O13 N1    | 86207.471                                                                                                                                  | 23213.94    | 7699.7037  | 9517961.7       | 29477.088  | 14909.719  | 13819.26   | 1398.648   | 283.2024   | 13522.45   | 22415.951  | 16467.971  | 5918849.4  |            |
| NEG | LPC(16:0)          | LPC(16:0)+HCOO    | LPC    | (16:0)         | (16:0)    |          |     | 540.330696  | C25 H51 O9 N1 P1  | 1183625.1                                                                                                                                  | 1227725.5   | 29977.492  | 69810.918       | 855436.32  | 6820.8648  | 137352.73  | 446955.29  | 1034423    | 30168.631  | 349158.22  | 40348.808  | 1715173.6  |            |
| NEG | LPC(18:1)          | LPC(18:1)+HCOO    | LPC    | (18:1)         | (18:1)    |          |     | 566.346346  | C27 H53 O9 N1 P1  | 4865920.3                                                                                                                                  | 3878956.9   | 190836.92  | 656954.19       | 4808847.2  | 362739.39  | 2299993.6  | 9232132.9  | 11671774   | 1032185.7  | 4305888.2  | 584501.3   | 14388784   |            |
| NEG | LPE(16:0)          | LPE(16:0)-H       | LPE    | (16:0)         | (16:0)    |          |     | 452.278266  | C21 H43 O7 N1 P1  | 13439.864                                                                                                                                  | 42972.508   | 1392482.9  | 4743149         | 18537.877  | 4700057.9  | 3020588.9  | 829784.57  | 19703.997  | 2018525.5  | 125768.9   | 898459.25  | 5588.726   |            |
| NEG | LPE(18:1)          | LPE(18:1)-H       | LPE    | (18:1)         | (18:1)    |          |     | 478.293916  | C23 H45 O7 N1 P1  | 25684.119                                                                                                                                  | 3643.6332   | 4469974.3  | 7484469.5       | 15401.651  | 8172692.1  | 7466692.6  | 4135176    | 2041140.1  | 13073229   | 5992089.8  | 4472685.4  | 28926.713  |            |
| NEG | LPE(18:2)          | LPE(18:2)-H       | LPE    | (18:2)         | (18:2)    |          |     | 476.278266  | C23 H43 O7 N1 P1  | 355575.66                                                                                                                                  | 127953.99   | 1440899.7  | 5753388.1       | 276106.82  | 6027576.4  | 2443698.4  | 418386.69  | 401708.03  | 260131.99  | 111313.85  | 27657.871  | 764896.66  |            |
| NEG | LPG(16:0)          | LPG(16:0)-H       | LPG    | (16:0)         | (16:0)    |          |     | 483.272847  | C22 H44 O9 N0 P1  | 0                                                                                                                                          | 0           | 1194008.03 | 52025.256       | 0          | 474582.22  | 3555.915   | 3298.7556  | 1646.286   | 934291.96  | 2116.833   | 26041.041  | 0          |            |
| NEG | LPI(16:0)          | LPI(16:0)-H       | LPI    | (16:0)         | (16:0)    |          |     | 571.288892  | C25 H48 O12 N0 P1 | 572034.4                                                                                                                                   | 620102.59   | 2605.068   | 121722.65       | 587770.2   | 127555.51  | 10265.174  | 521781.85  | 686178.73  | 70503.653  | 130439.11  | 3551.526   | 1331459.9  |            |
| NEG | LPI(18:1)          | LPI(18:1)-H       | LPI    | (18:1)         | (18:1)    |          |     | 597.304542  | C27 H50 O12 N0 P1 | 861998.49                                                                                                                                  | 610017.02   | 24751.836  | 202788.02       | 921926.77  | 163923.79  | 38008.032  | 2392143.6  | 2459355.1  | 382992.79  | 121008.3   | 152527.76  | 480806.8   |            |
| NEG | MGDG(16:0/18:1)    | MGDG(34:1)+HCOO   | MGDG   | (16:0_18:1)    | (16:0)    | (18:1)   |     | 87.573534   | C44 H81 O12       | 70293.134                                                                                                                                  | 705044.48   | 5261389.1  | 5321092.7       | 2665805.9  | 13371307   | 14891845   | 4372594.2  | 2703222.3  | 9468084.8  | 7546569.9  | 3334865.5  | 76669.246  |            |
| NEG | MGDG(18:1/18:1)    | MGDG(36:3)+HCOO   | MGDG   | (18:1_18:1)    | (18:1)    | (18:1)   |     | 8021.589004 | C46 H83 O12       | 26920.385                                                                                                                                  | 175573.77   | 5667475    | 56852.184       | 1192159.1  | 1189560    | 8947137.4  | 3096941.1  | 11586460   | 518225.8   | 15150524   | 37370.34   |            |            |
| NEG | MGDG(18:1/18:2)    | MGDG(36:3)+HCOO   | MGDG   | (18:1_18:2)    | (18:1)    | (18:2)   |     | 825.573354  | C46 H81 O12       | 14993.329                                                                                                                                  | 755663.61   | 11087807   | 9393715         | 59551.208  | 1774877.6  | 14005911   | 684012.86  | 550358.5   | 2498977.2  | 106201.25  | 914281.32  | 19757.942  |            |
| NEG | MGDG(18:2/18:2)    | MGDG(36:3)+HCOO   | MGDG   | (18:2_18:2)    | (18:2)    | (18:2)   |     | 9876.2166   | 16338.189         | 947262.57                                                                                                                                  | 118827.61   | 146053.61  | 896796.62       | 2632564.7  | 283588.76  | 2514940.2  | 139077.42  | 515113.73  | 50442.26   | 29507.179  |            |            |            |
| NEG | MGDG(37:2)         | MGDG(37:2)+HCOO   | MGDG   | (37:2)         | (37:2)    |          |     | 841.604654  | C47 H85 O12       | 36689.215                                                                                                                                  | 91217.736   | 3540001.1  | 1223882.1       | 100399.14  | 12276105.6 | 6982237.5  | 36887.637  | 165049.57  | 100244.48  | 335115.1   | 2757065.5  | 58908.441  |            |
| NEG | MGDG(37:3)         | MGDG(37:3)+HCOO   | MGDG   | (37:3)         | (37:3)    |          |     | 839.589004  | C47 H83 O12       | 553.51839                                                                                                                                  | C42 H73 O11 | 780.354007 | C61 H110 O16 P2 | 75.0       | 129482.4   | 13301404   | 15316945   | 23317473   | 23848863   | 83596512.1 | 14131768   | 5943744.6  | 62129.924  |
| NEG | MGMG(32:4)         | MGMG(32:4)+HCOO   | MGMG   | (32:4)         | (32:4)    |          |     | 563.504484  | C38 H67 O4        | 676806.45                                                                                                                                  | 842127.11   | 29152.163  | 0               | 2109878.3  | 36373.999  | 1791834.9  | 15052695   | 12382434   | 0          | 2818946    | 1934748.5  | 7222533.3  |            |
| NEG | MLCL(52:4)         | MLCL(52:4)-2H     | MLCL   | (52:4)         | (52:4)    |          |     | 549490.44   | 903130.99         | 0                                                                                                                                          | 0           | 712530.63  | 0               | 0          | 0          | 0          | 0          | 0          | 0          | 0          | 0          | 0          |            |
| NEG | OAHPA(36:1)        | OAHPA(36:1)-H     | OAHPA  | (36:1)         | (36:1)    |          |     | 587.504484  | C38 H67 O4        | 585.488834                                                                                                                                 | C38 H65 O4  | 587.504484 | C38 H65 O4      | 585.488834 | C38 H65 O4 | 587.504484 | C38 H65 O4 | 585.488834 | C38 H65 O4 | 587.504484 | C38 H65 O4 | 585.488834 | C38 H65 O4 |
| NEG | OAHPA(38:2)        | OAHPA(38:2)-H     | OAHPA  | (38:2)         | (38:2)    |          |     | 587.504484  | C38 H67 O4        | 585.488834                                                                                                                                 | C38 H65 O4  | 587.504484 | C38 H65 O4      | 585.488834 | C38 H65 O4 | 587.504484 | C38 H65 O4 | 585.488834 | C38 H65 O4 | 587.504484 | C38 H65 O4 | 585.488834 | C38 H65 O4 |
| NEG | OAHPA(38:3)        | OAHPA(38:3)-H     | OAHPA  | (38:3)         | (38:3)    |          |     | 587.504484  | C38 H67 O4        | 585.488834                                                                                                                                 | C38 H65 O4  | 587.504484 | C38 H65 O4      | 585.488834 | C38 H65 O4 | 587.504484 | C38 H65 O4 | 585.488834 | C38 H65 O4 | 587.504484 | C38 H65 O4 | 585.488834 | C38 H65 O4 |
| NEG | OAHPA(38:4)        | OAHPA(38:4)-H     | OAHPA  | (38:4)         | (38:4)    |          |     | 587.504484  | C38 H67 O4        | 585.488834                                                                                                                                 | C38 H65 O4  | 587.504484 | C38 H65 O4      | 585.488834 | C38 H65 O4 | 587.504484 | C38 H65 O4 | 585.488834 | C38 H65 O4 | 587.504484 | C38 H65 O4 | 585.488834 | C38 H65 O4 |
| NEG | OAHPA(40:4)        | OAHPA(40:4)-H     | OAHPA  | (40:4)         | (40:4)    |          |     | 611.504484  | C40 H69 O4        | 611.504484                                                                                                                                 | C40 H67 O4  | 611.504484 | C40 H67 O4      | 611.504484 | C40 H67 O4 | 611.504484 | C40 H67 O4 | 611.504484 | C40 H67 O4 | 611.504484 | C40 H67 O4 | 611.504484 | C40 H67 O4 |
| NEG | OAHPA(40:5)        | OAHPA(40:5)-H     | OAHPA  | (40:5)         | (40:5)    |          |     | 611.504484  | C40 H69 O4        | 611.504484                                                                                                                                 | C40 H67 O4  | 611.504484 | C40 H67 O4      | 611.504484 | C40 H67 O4 | 611.504484 | C40 H67 O4 | 611.504484 | C40 H67 O4 | 611.504484 | C40 H67 O4 | 611.504484 | C40 H67 O4 |
| NEG | PC(15:0/18:1)      | PC(33:1)+HCOO     | PC     | (15:0_18:1)    | (15:0)    | (18:1)   |     | 79.573534   | C42 H81 O10 N1 P1 | 619.96361                                                                                                                                  | 716902.1    | 6140.8074  | 0               | 2436800.2  | 63776.664  | 258131.13  | 1818662.1  | 624580.29  | 4908.456   | 452776.99  | 21982.641  | 100099.6   |            |
| NEG | PC(16:0/17:0)      | PC(33:0)+HCOO     | PC     | (16:0_17:0)    | (16:0)    | (17:0)   |     | 79.573534   | C42 H81 O10 N1 P1 | 619.96361                                                                                                                                  | 716902.1    | 6140.8074  | 0               | 2436800.2  | 63776.664  | 258131.13  | 1818662.1  | 624580.29  | 4908.456   | 452776.99  | 21982.641  | 100099.6   |            |
| NEG | PC(17:0/18:1)      | PC(33:0)+HCOO     | PC     | (17:0_18:1)    | (17:0)    | (18:1)   |     | 818.591391  | C44 H85 O10 N1 P1 | 704905.08                                                                                                                                  | 736933.25   | 44913018.8 | 45737891.1      | 1878966    | 1588172.8  | 20334419   | 98986615.5 | 4497522.4  | 31388.616  | 66963826.6 | 457733.95  | 780200.68  | 10804.709  |
| NEG | PC(18:0/18:2)      | PC(36:4)+HCOO     | PC     | (18:2_18:2)    | (18:2)    | (18:2)   |     | 826.505661  | C46 H89 O10 N1 P1 | 233663.85                                                                                                                                  | 2975858     | 2242696.1  | 63931984        | 1569281.7  | 97476329   | 103251.902 | 1493392.2  | 1506142.4  | 387396.24  | 251109.58  | 190676.57  | 66490.194  |            |
| NEG | PC(19:0/18:1)      | PC(37:1)+HCOO     | PC     | (19:0_18:1)    | (19:0)    | (18:1)   |     | 846.622961  | C46 H89 O10 N1 P1 | 52972420                                                                                                                                   | 51459315    | 9061.56    | 26107.473       | 43201977   | 3999172    | 87669.811  | 40410521   | 29305632   | 186156.81  | 23265479   | 2933021.3  | 67893951   |            |
| NEG | PC(19:1/18:1)      | PC(37:2)+HCOO     | PC     | (19:1_18:1)    | (19:1)    | (18:1)   |     | 844.607711  | C46 H87 O10 N1 P1 | 57353643                                                                                                                                   | 52325568    | 479187556  | 304430412       | 71124334   | 407265358  | 832059289  | 394574443  | 237912420  | 11836.09   | 587794054  | 648327097  | 25503909   |            |
| NEG | PC(19:1/18:2)      | PC(37:3)+HCOO     | PC     | (19:1_18:2)    | (19:1)    | (18:2)   |     | 7365720.2   | 3600400.1         | 372631264                                                                                                                                  | 511284570   | 36885583   | 610327555       | 568851711  | 21558759   | 150295666  | 110107985  | 607880056  | 17179118   | 32842388   | 398090.16  |            |            |
| NEG | PC(36:5)           | PC(36:5)+HCOO     | PC     | (36:5)         | (36:5)    |          |     | 824.547711  | C45 H79 O10 N1 P1 | 2059733.8                                                                                                                                  | 2348020.9   | 24859842   | 8624096.8       | 712344.06  | 14189407   | 22849283   | 21047646   | 8476060.6  | 53760257   | 27265614   | 35024661   | 81731.08   |            |
| NEG | PC(37:4)           | PC(37:4)+HCOO     | PC     | (37:4)         | (37:4)    |          |     | 60354307    | 350562386         | 117624.8                                                                                                                                   | 267360.74   | 137269894  | 5321983.9       | 10958316   | 553811.61  | 1615054.3  | 2088.114   | 856330.67  | 178064.69  | 13262312   |            |            |            |
| NEG | PE(16:0/16:0)      | PE(32:0)-H        | PE     | (16:0_16:0)    | (16:0)    | (16:0)   |     | 690.507931  | C43 H77 O8 N1 P1  | 714.507713                                                                                                                                 | 173014919   | 142622.67  | 47453.022       | 75211024   | 799707.12  | 128434.26  | 21495.471  | 1184337.5  | 0.142      | 149051.01  | 1.044      | 38311042.5 |            |
| NEG | PE(16:1/18:1)      | PE(31:1/18:1)-H   | PE     | (16:1)         | (18:1)    |          |     | 728.532531  | C40 H75 O8 N1 P1  | 0                                                                                                                                          | 0           | 978150.03  | 2683152.6       | 0          | 0          | 2130138.5  | 11791      |            |            |            |            |            |            |

|     |                    |              |    |                  |        |        |        |            |                 |           |           |           |           |           |           |           |           |           |           |           |           |           |
|-----|--------------------|--------------|----|------------------|--------|--------|--------|------------|-----------------|-----------|-----------|-----------|-----------|-----------|-----------|-----------|-----------|-----------|-----------|-----------|-----------|-----------|
| POS | TG(18:0/17:0/18:1) | TG(53:1)+NH4 | TG | (18:0_17:0_18:1) | (18:0) | (17:0) | (18:1) | 892.832765 | C56 H110 O6 N1  | 1006486.7 | 1837796.5 | 7242.2376 | 761641.6  | 21438556  | 4419967.2 | 14525109  | 12682795  | 7224374.9 | 0         | 4069709.4 | 5076698.3 | 13331888  |
| POS | TG(18:0/18:1/18:1) | TG(54:2)+NH4 | TG | (18:0_18:1_18:1) | (18:0) | (18:1) | (18:1) | 904.832765 | C57 H110 O6 N1  | 1.01E+09  | 905322274 | 66988166  | 284922585 | 2.935E+09 | 1.979E+09 | 2.26E+09  | 3.218E+09 | 2.933E+09 | 3509241.8 | 2.216E+09 | 2.222E+09 | 2.568E+09 |
| POS | TG(18:0/18:1/18:3) | TG(54:4)+H   | TG | (18:0_18:1_18:3) | (18:0) | (18:1) | (18:3) | 883.774916 | C57 H103 O6     | 699700.53 | 569138773 | 31654753  | 38259386  | 1.017E+09 | 13913418  | 744822250 | 64657483  | 67469507  | 64089243  | 63058686  | 23382203  | 496232    |
| POS | TG(18:0/18:1/24:0) | TG(60:1)+NH4 | TG | (18:0_18:1_24:0) | (18:0) | (18:1) | (24:0) | 990.942315 | C63 H124 O6 N1  | 479472.15 | 314463.35 | 0         | 1430524.1 | 23124477  | 9151813.3 | 13623259  | 21245010  | 34784506  | 952949.09 | 5002610.2 | 3508607.6 | 35136176  |
| POS | TG(18:1/10:1/10:1) | TG(38:3)+Na  | TG | (18:1_10:1_10:1) | (18:1) | (10:1) | (10:1) | 683.522112 | C41 H72 O6 Na1  | 234283.8  | 39615152  | 0         | 0         | 45990627  | 238861.29 | 41809365  | 2453584.1 | 8469310.6 | 0         | 1156714   | 0         | 19268983  |
| POS | TG(18:1/14:0/18:2) | TG(50:3)+NH4 | TG | (18:1_14:0_18:2) | (18:1) | (14:0) | (18:2) | 846.754515 | C53 H100 O6 N1  | 241389847 | 3705065.2 | 197707917 | 320560971 | 2879351.2 | 309712940 | 3050222.1 | 97212440  | 20668226  | 1171126.6 | 97750494  | 61347200  | 40686508  |
| POS | TG(18:1/14:1/20:4) | TG(52:6)+H   | TG | (18:1_14:1_20:4) | (18:1) | (14:1) | (20:4) | 851.712316 | C55 H95 O6      | 14588392  | 2726700.8 | 267417103 | 246032877 | 3207835.6 | 11011733  | 1495011.3 | 48486639  | 19635510  | 95473371  | 31267691  | 10526184  | 2159528.1 |
| POS | TG(18:1/17:1/18:1) | TG(53:3)+Na  | TG | (18:1_17:1_18:1) | (18:1) | (17:1) | (18:1) | 893.756861 | C56 H102 O6 Na1 | 113977504 | 10606206  | 236705063 | 219860765 | 25808765  | 212510288 | 9250831.9 | 12232226  | 6519154.9 | 116708411 | 12128438  | 60869813  | 532028.76 |
| POS | TG(18:1/17:1/18:2) | TG(53:4)+Na  | TG | (18:1_17:1_18:2) | (18:1) | (17:1) | (18:2) | 891.741211 | C56 H100 O6 Na1 | 43586400  | 136417150 | 3865185   | 19883040  | 624556336 | 108745723 | 432976681 | 21902486  | 41298004  | 0         | 19874461  | 16508848  | 8554302.8 |
| POS | TG(18:1/17:1/20:4) | TG(55:6)+H   | TG | (18:1_17:1_20:4) | (18:1) | (17:1) | (20:4) | 893.759266 | C58 H101 O6     | 51975980  | 198364027 | 10347520  | 19452952  | 588359950 | 233240410 | 344931538 | 269783495 | 251286982 | 3111464.7 | 159382369 | 218461627 | 80349077  |
| POS | TG(18:1/18:1/18:1) | TG(54:3)+NH4 | TG | (18:1_18:1_18:1) | (18:1) | (18:1) | (18:1) | 902.817115 | C57 H108 O6 N1  | 1.205E+09 | 4.723E+09 | 80948989  | 158794519 | 1.63E+09  | 2.625E+09 | 3.998E+09 | 1.053E+10 | 1.541E+10 | 27128670  | 6.621E+09 | 4.646E+09 | 6.344E+09 |
| POS | TG(18:1/18:1/18:2) | TG(54:4)+NH4 | TG | (18:1_18:1_18:2) | (18:1) | (18:1) | (18:2) | 900.801465 | C57 H106 O6 N1  | 8.282E+09 | 58631878  | 7.624E+09 | 8.885E+09 | 1.4E+09   | 1.037E+10 | 1.385E+09 | 483052490 | 640420066 | 2.464E+09 | 1.228E+09 | 3.895E+09 | 154665734 |
| POS | TG(18:1/18:1/18:3) | TG(54:5)+H   | TG | (18:1_18:1_18:3) | (18:1) | (18:1) | (18:3) | 881.759266 | C57 H101 O6     | 55692773  | 954046034 | 735551846 | 4.577E+09 | 922712221 | 570922830 | 815727460 | 16566328  | 36514095  | 6806919.6 | 56671416  | 169960517 | 20187750  |
| POS | TG(18:1/18:1/20:3) | TG(56:5)+H   | TG | (18:1_18:1_20:3) | (18:1) | (18:1) | (20:3) | 909.790566 | C59 H105 O6     | 940869469 | 315963554 | 1.097E+09 | 1.248E+09 | 616948327 | 1.164E+09 | 228912302 | 577083012 | 915957163 | 1.434E+09 | 758809714 | 1.024E+09 | 418526683 |
| POS | TG(18:1/18:1/20:4) | TG(56:6)+H   | TG | (18:1_18:1_20:4) | (18:1) | (18:1) | (20:4) | 907.774916 | C59 H103 O6     | 3.576E+09 | 4.149E+09 | 119651690 | 14707460  | 3.637E+09 | 3.847E+09 | 1.065E+09 | 7.776E+09 | 7.947E+09 | 331779416 | 6.72E+09  | 5.924E+09 | 8.128E+09 |
| POS | TG(18:1/18:1/20:5) | TG(56:7)+H   | TG | (18:1_18:1_20:5) | (18:1) | (18:1) | (20:5) | 905.759266 | C59 H101 O6     | 22001318  | 32504518  | 31017017  | 16576316  | 56719579  | 52138781  | 122420968 | 4058554.5 | 8061040.5 | 9621620.8 | 6653259.9 | 5081347.9 | 8927693.3 |
| POS | TG(18:1/18:1/21:0) | TG(57:2)+NH4 | TG | (18:1_18:1_21:0) | (18:1) | (18:1) | (21:0) | 946.879715 | C60 H116 O6 N1  | 303587.59 | 20169367  | 384111.34 | 408242.5  | 34702129  | 4663932.5 | 27297225  | 14735810  | 27724623  | 651914.68 | 7167737.2 | 5978238.4 | 29606545  |
| POS | TG(18:1/18:1/22:0) | TG(58:2)+NH4 | TG | (18:1_18:1_22:0) | (18:1) | (18:1) | (22:0) | 960.895365 | C61 H118 O6 N1  | 59104459  | 65990628  | 376930.82 | 27789.944 | 962016740 | 290693559 | 723555767 | 975771772 | 1.615E+09 | 2513987.1 | 461150136 | 377023931 | 1.156E+09 |
| POS | TG(18:1/18:1/23:0) | TG(59:2)+Na  | TG | (18:1_18:1_23:0) | (18:1) | (18:1) | (23:0) | 979.866411 | C62 H116 O6 Na1 | 238691.49 | 222675.56 | 3.861     | 383470.24 | 23521117  | 3605712.2 | 17780293  | 17732195  | 29176661  | 0         | 6432083.4 | 4981496.4 | 3983971   |
| POS | TG(18:1/18:1/24:0) | TG(60:2)+Na  | TG | (18:1_18:1_24:0) | (18:1) | (18:1) | (24:0) | 993.882061 | C63 H118 O6 Na1 | 17556117  | 18370827  | 1508091.1 | 26983586  | 248973761 | 111945357 | 157518534 | 314744916 | 514985280 | 161501.9  | 148880336 | 105273345 | 383258299 |
| POS | TG(18:1/18:2/18:2) | TG(54:5)+NH4 | TG | (18:1_18:2_18:2) | (18:1) | (18:2) | (18:2) | 898.785815 | C57 H104 O6 N1  | 1.413E+09 | 7.62E+09  | 95836105  | 239872442 | 9.792E+09 | 3.039E+09 | 7.977E+09 | 1.025E+09 | 2.231E+09 | 1766454.7 | 760611554 | 239864282 | 2.019E+09 |
| POS | TG(18:1/18:2/20:5) | TG(56:8)+H   | TG | (18:1_18:2_20:5) | (18:1) | (18:2) | (20:5) | 903.743616 | C59 H99 O6      | 6.462E+09 | 3.121E+09 | 322681141 | 1.097E+09 | 3.708E+09 | 7.347E+09 | 1.042E+09 | 1.091E+09 | 1.081E+09 | 6010412.1 | 1.24E+09  | 1.233E+09 | 766934261 |
| POS | TG(18:1/18:2/21:0) | TG(57:3)+Na  | TG | (18:1_18:2_21:0) | (18:1) | (18:2) | (21:0) | 949.819461 | C60 H110 O6 Na1 | 206829.25 | 5434298.9 | 0         | 616310.48 | 60661531  | 8228325.5 | 43277731  | 743465.11 | 27094683  | 218115.14 | 2008098.9 | 2616279.5 | 8376084.7 |
| POS | TG(18:1/18:2/22:0) | TG(58:3)+Na  | TG | (18:1_18:2_22:0) | (18:1) | (18:2) | (22:0) | 963.835111 | C61 H112 O6 Na1 | 296524362 | 190893683 | 15219883  | 6292670.2 | 447417412 | 554063191 | 637967743 | 191796171 | 472324601 | 44411915  | 128719210 | 124277105 | 355376163 |
| POS | TG(18:1/18:2/23:0) | TG(59:3)+Na  | TG | (18:1_18:2_23:0) | (18:1) | (18:2) | (23:0) | 977.850761 | C62 H114 O6 Na1 | 2984078.3 | 1994043.8 | 0         | 404932.45 | 44931467  | 12842394  | 34047218  | 1222432   | 6143657.6 | 0         | 1239892.6 | 978580.82 | 9441475.2 |
| POS | TG(18:1/18:2/24:0) | TG(60:3)+Na  | TG | (18:1_18:2_24:0) | (18:1) | (18:2) | (24:0) | 991.866411 | C63 H116 O6 Na1 | 52630720  | 37421520  | 460759.13 | 35491220  | 344042543 | 153382350 | 240061021 | 38546456  | 117624509 | 2738239.7 | 26335259  | 18261959  | 118107498 |
| POS | TG(18:1/20:3/24:0) | TG(61:4)+H   | TG | (18:1_20:3_24:0) | (18:1) | (20:3) | (24:0) | 995.900116 | C65 H119 O6     | 158714.23 | 388614.65 | 0         | 105421.69 | 25706954  | 6667957.9 | 13264461  | 16263470  | 27657673  | 1842861.5 | 4480074.4 | 3396865   | 32587402  |
| POS | TG(18:2/14:1/18:2) | TG(50:5)+Na  | TG | (18:2_14:1_18:2) | (18:2) | (14:1) | (18:2) | 847.678611 | C53 H92 O6 Na1  | 9558878.4 | 24027347  | 263666.25 | 370673.05 | 36414331  | 18948161  | 25093695  | 436892.03 | 181281.33 | 0         | 156291.29 | 0         | 208901.96 |
| POS | TG(18:2/17:1/18:2) | TG(55:5)+Na  | TG | (18:2_17:1_18:2) | (18:2) | (17:1) | (18:2) | 889.725561 | C56 H98 O6 Na1  | 51388339  | 218408.69 | 21956320  | 62455253  | 26166969  | 93715815  | 11571953  | 713337.38 | 1990553   | 0         | 203103.71 | 529658.51 | 746390.8  |
| POS | TG(18:2/18:2/18:2) | TG(54:6)+NH4 | TG | (18:2_18:2_18:2) | (18:2) | (18:2) | (18:2) | 896.770165 | C57 H102 O6 N1  | 6.392E+09 | 333592855 | 5.2E+09   | 7.925E+09 | 1.177E+09 | 6.136E+09 | 509770230 | 35009764  | 89225998  | 990170.82 | 58893756  | 80442527  | 12017221  |
| POS | TG(18:2/18:2/21:0) | TG(57:4)+Na  | TG | (18:2_18:2_21:0) | (18:2) | (18:2) | (21:0) | 947.803811 | C60 H108 O6 Na1 | 314822.92 | 4735289.5 | 0         | 1310429.1 | 41170406  | 1512461.6 | 30156916  | 0         | 2270813.1 | 0         | 0         | 0         | 708230.59 |
| POS | TG(18:2/18:2/23:0) | TG(59:4)+Na  | TG | (18:2_18:2_23:0) | (18:2) | (18:2) | (23:0) | 975.835111 | C62 H112 O6 Na1 | 1212167   | 2357524   | 0         | 0         | 41722355  | 5453184.9 | 37710831  | 0         | 938183.02 | 0         | 0         | 0         | 1820703.3 |
| POS | TG(18:2/20:4/21:0) | TG(59:6)+H   | TG | (18:2_20:4_21:0) | (18:2) | (20:4) | (23:0) | 949.821866 | C62 H109 O6     | 6521283.8 | 5441970.5 | 1875598.9 | 14117795  | 60735286  | 14514142  | 43154058  | 2076929.4 | 27422389  | 1410174.7 | 1066456.9 | 2519230.1 | 2972118.4 |
| POS | TG(18:2/18:2/18:2) | TG(54:7)+NH4 | TG | (18:2_18:2_18:2) | (18:3) | (18:2) | (18:2) | 894.754515 | C57 H100 O6 N1  | 130650806 | 410661.1  | 24021095  | 113176398 | 1902645.9 | 71742038  | 3444271.3 | 824431.74 | 1033240.7 | 85868.382 | 3190653.4 | 4877802.5 | 308813.68 |
| POS | TG(19:0/18:1/18:1) | TG(55:2)+NH4 | TG | (19:0_18:1_18:1) | (19:0) | (18:1) | (18:1) | 918.848415 | C58 H112 O6 N1  | 342823.73 | 3106071.6 | 1015103.5 | 112641.01 | 47703517  | 4813763   | 41592347  | 21182460  | 20681051  | 1810403.2 | 7982467.1 | 9697874.1 | 22933258  |
| POS | TG(19:1/18:1/18:1) | TG(55:3)+Na  | TG | (19:1_18:1_18:1) | (19:1) | (18:1) | (18:1) | 921.788161 | C58 H106 O6 Na1 | 6425658.7 | 26698381  | 332110.09 | 2033485.4 | 120661282 | 42917054  | 72650787  | 70770716  | 104900760 | 0         | 517237.6  | 43303998  | 73347062  |
| POS | TG(19:1/18:1/18:2) | TG(55:4)+Na  | TG | (19:1_18:1_18:2) | (19:1) | (18:1) | (18:2) | 919.772511 | C58 H104 O6 Na1 | 29644832  | 38385826  | 558908.01 | 2760239.9 | 157657118 | 62256001  | 82697126  | 4723991.1 | 9683320.8 | 0         | 3772085.1 | 3913096.3 | 5957386.6 |
| POS | TG(19:1/18:2/18:2) | TG(55:5)+Na  | TG | (19:1_18:2_18:2) | (19:1) | (18:2) | (18:2) | 917.756861 | C58 H102 O6 Na1 | 22558657  | 3401421   | 12682527  | 35101226  | 22298651  | 41286607  | 5214802.5 | 0         | 1130991.6 | 0         | 188904.91 | 0         | 131733.01 |
| POS | TG(20:0/16:0/18:1) | TG(54:1)+Na  | TG | (20:0_16:0_18:1) | (20:0) | (16:0) | (18:1) | 911.803811 | C57 H108 O6 Na1 | 48540372  | 60494611  | 124146.11 | 639953.1  | 193490899 | 146405744 | 282299170 | 211562751 | 162253902 | 4895394.7 | 101289472 | 118846039 | 197964557 |
| POS | TG(20:0/18:1/18:1) | TG(56:2)+NH4 | TG | (20:0_18:1_18:1) | (20:0) | (18:1) | (18:1) | 932.864065 | C59 H114 O6 N1  | 285190687 | 17363825  | 255153920 | 635293661 | 195961576 | 804007160 | 145081240 | 216904414 | 280728436 | 547950313 | 192425924 | 345332845 | 41862948  |
| POS | TG(20:0/18:1/20:4) | TG(58:5)+H   | TG | (20:0_18:1_20:4) | (20:0) | (18:1) | (20:4) | 937.821866 | C61 H109 O6     | 124038918 | 215473850 | 1037910.3 | 114608813 | 590239600 | 623663226 | 445955174 | 911106465 | 1.02E+09  | 714836.4  | 560541676 | 592645780 | 863281841 |
| POS | TG(20:0/18:2/20:5) | TG(58:7)+H   | TG | (20:0_18:2_20:5) | (20:0) | (18:2) | (20:5) | 933.790566 | C61 H105 O6     | 819789138 | 122081050 | 555027540 | 881406275 | 61965232  |           |           |           |           |           |           |           |           |
